# Supplementary material for: Pb4Zn2B10O21: a congruently melting lead zinc borate with a novel [B10O24] anionic group and an interesting [Pb4O12]∞chain
Source: Royal Society of Chemistry journal article supplement (doi:10.1039/c3nj00893b), 2013-10-14

Supporting Information

**Pb<sub>4</sub>Zn<sub>2</sub>B<sub>10</sub>O<sub>21</sub>: a congruently melting lead zinc borate with a novel [B<sub>10</sub>O<sub>24</sub>]  
anionic group and an interesting [Pb<sub>4</sub>O<sub>12</sub>]<sub>∞</sub> chain**

**Hongwei Yu,<sup>a,b</sup> Hongping Wu,<sup>\*a</sup> Shilie Pan,<sup>\*a</sup> Bingbing Zhang,<sup>a,b</sup> Lingyun Dong,<sup>a,b</sup> Shujuan  
Han,<sup>a</sup> Zhihua Yang<sup>a</sup>**

<sup>a</sup> *Key Laboratory of Functional Materials and Devices for Special Environments of CAS; Xinjiang  
Key Laboratory of Electronic Information Materials and Devices; Xinjiang Technical Institute of  
Physics & Chemistry of CAS, 40-1 South Beijing Road, Urumqi 830011, China.*

<sup>b</sup> *University of Chinese Academy of Sciences, Beijing 100049, China*

To whom correspondence should be addressed. Phone: (+86)991-3674558. Fax:

(+86)991-3838957. E-mail: slpan@ms.xjb.ac.cn (Shilie Pan); wuhp@ms.xjb.ac.cn (Hongping  
Wu).

**Table S1.** Atomic coordinates ( $\times 10^4$ ) and equivalent isotropic displacement parameters ( $\text{\AA}^2 \times 10^3$ ) for  $\text{Pb}_4\text{Zn}_2\text{B}_{10}\text{O}_{21}$ .  $U_{\text{eq}}$  is defined as one-third of the trace of the orthogonalized  $U_{ij}$  tensor.

| Atom  | x       | y        | z       | $U_{\text{eq}}$ | BVS  |
|-------|---------|----------|---------|-----------------|------|
| Pb(1) | -749(1) | 9384(1)  | 4180(1) | 13(1)           | 1.99 |
| Pb(2) | -778(1) | 6904(1)  | 4226(1) | 14(1)           | 1.94 |
| Pb(3) | 701(1)  | 8324(1)  | 6185(1) | 14(1)           | 1.92 |
| Pb(4) | 697(1)  | 5839(1)  | 5999(1) | 15(1)           | 1.96 |
| Zn(1) | 2498(1) | 4486(1)  | 7507(1) | 7(1)            | 2.14 |
| Zn(2) | 2518(1) | 6993(1)  | 7510(1) | 7(1)            | 2.25 |
| B(1)  | 763(9)  | 5459(6)  | 3632(9) | 13(3)           | 3.01 |
| B(2)  | 1666(7) | 5789(6)  | 8618(8) | 7(2)            | 3.12 |
| B(3)  | -641(8) | 9489(6)  | 6718(9) | 9(2)            | 3.01 |
| B(4)  | 1627(7) | 6734(6)  | 3568(8) | 8(2)            | 3.01 |
| B(5)  | 3387(7) | 6757(6)  | 3553(8) | 8(2)            | 3.08 |
| B(6)  | -623(8) | 6998(6)  | 6739(8) | 9(2)            | 2.98 |
| B(7)  | 2533(7) | 6820(6)  | 5177(9) | 12(3)           | 3.07 |
| B(8)  | 769(8)  | 7984(6)  | 3596(8) | 11(2)           | 3.16 |
| B(9)  | 3422(7) | 5712(6)  | 8529(8) | 4(2)            | 3.07 |
| B(10) | 2618(8) | 4281(6)  | 5169(8) | 10(2)           | 3.07 |
| O(1)  | 2523(4) | 8020(3)  | 8099(5) | 7(2)            | 1.99 |
| O(2)  | 2499(4) | 5507(3)  | 8102(5) | 7(2)            | 1.95 |
| O(3)  | -129(4) | 9410(3)  | 5765(5) | 9(1)            | 2.31 |
| O(4)  | -157(4) | 6882(3)  | 5754(5) | 10(1)           | 2.31 |
| O(5)  | 1413(4) | 4051(3)  | 8197(5) | 10(1)           | 2.11 |
| O(6)  | 3413(5) | 5625(4)  | 9610(5) | 14(2)           | 1.97 |
| O(7)  | 1480(4) | 6558(4)  | 8223(5) | 11(1)           | 2.09 |
| O(8)  | 3554(4) | 6537(4)  | 8251(5) | 11(1)           | 2.17 |
| O(9)  | -850(4) | 7803(3)  | 6883(5) | 9(1)            | 1.99 |
| O(10) | 3345(4) | 6885(4)  | 4651(5) | 12(2)           | 1.93 |
| O(11) | 0       | 6700(5)  | 7500    | 12(2)           | 2.04 |
| O(12) | 119(5)  | 5708(4)  | 4254(5) | 16(2)           | 1.98 |
| O(13) | 0       | 9161(5)  | 7500    | 10(2)           | 2.07 |
| O(14) | 1805(4) | 4189(4)  | 4722(5) | 12(2)           | 1.99 |
| O(15) | 852(4)  | 7218(3)  | 3330(5) | 11(1)           | 1.98 |
| O(16) | -863(4) | 5308(4)  | 6603(5) | 10(1)           | 2.04 |
| O(17) | 60(5)   | 8201(4)  | 4150(5) | 14(2)           | 2.02 |
| O(18) | 3511(4) | 4046(3)  | 8286(5) | 8(1)            | 2.11 |
| O(19) | -850(4) | 10289(3) | 6925(5) | 10(1)           | 1.87 |
| O(20) | 1724(5) | 6694(4)  | 4675(5) | 18(2)           | 1.91 |
| O(21) | 2740(6) | 4258(4)  | 6172(6) | 25(2)           | 1.93 |
| O(22) | 2518(6) | 6889(6)  | 6154(8) | 44(3)           | 2.06 |

**Table S2.** Selected bond distances (Å) and angles (deg) for Pb<sub>4</sub>Zn<sub>2</sub>B<sub>10</sub>O<sub>21</sub>.

|              |           |                      |            |
|--------------|-----------|----------------------|------------|
| Pb(1)-O(3)   | 2.294(7)  | O(13)-Pb(3)-O(9)#2   | 64.56(18)  |
| Pb(1)-O(17)  | 2.382(6)  | O(9)-Pb(3)-O(9)#2    | 67.6(2)    |
| Pb(1)-O(3)#1 | 2.470(6)  | O(4)-Pb(4)-O(12)     | 75.5(2)    |
| Pb(2)-O(4)   | 2.225(7)  | O(4)-Pb(4)-O(16)     | 81.2(2)    |
| Pb(2)-O(12)  | 2.469(7)  | O(12)-Pb(4)-O(16)    | 87.6(2)    |
| Pb(2)-O(17)  | 2.579(6)  | O(4)-Pb(4)-O(11)     | 56.1(2)    |
| Pb(2)-O(15)  | 2.718(6)  | O(12)-Pb(4)-O(11)    | 127.97(17) |
| Pb(3)-O(3)   | 2.321(6)  | O(16)-Pb(4)-O(11)    | 68.82(18)  |
| Pb(3)-O(13)  | 2.499(5)  | O(4)-Pb(4)-O(20)     | 76.6(2)    |
| Pb(3)-O(9)   | 2.612(6)  | O(12)-Pb(4)-O(20)    | 68.7(2)    |
| Pb(3)-O(9)#2 | 2.735(6)  | O(16)-Pb(4)-O(20)    | 150.8(2)   |
| Pb(4)-O(4)   | 2.234(6)  | O(11)-Pb(4)-O(20)    | 112.1(2)   |
| Pb(4)-O(12)  | 2.479(7)  | O(21)-Zn(1)-O(2)     | 125.8(3)   |
| Pb(4)-O(16)  | 2.587(7)  | O(21)-Zn(1)-O(18)    | 106.1(3)   |
| Pb(4)-O(11)  | 2.699(5)  | O(2)-Zn(1)-O(18)     | 98.3(3)    |
| Pb(4)-O(20)  | 2.754(7)  | O(21)-Zn(1)-O(5)     | 120.8(3)   |
| Zn(1)-O(21)  | 1.854(8)  | O(2)-Zn(1)-O(5)      | 99.4(3)    |
| Zn(1)-O(2)   | 1.953(6)  | O(18)-Zn(1)-O(5)     | 102.0(3)   |
| Zn(1)-O(18)  | 1.963(6)  | O(22)-Zn(2)-O(7)     | 116.5(3)   |
| Zn(1)-O(5)   | 1.983(6)  | O(22)-Zn(2)-O(1)     | 119.3(4)   |
| Zn(2)-O(22)  | 1.812(10) | O(7)-Zn(2)-O(1)      | 99.6(3)    |
| Zn(2)-O(7)   | 1.943(6)  | O(22)-Zn(2)-O(8)     | 117.2(3)   |
| Zn(2)-O(1)   | 1.959(6)  | O(7)-Zn(2)-O(8)      | 101.3(3)   |
| Zn(2)-O(8)   | 1.975(6)  | O(1)-Zn(2)-O(8)      | 99.7(3)    |
| B(1)-O(12)   | 1.326(14) | O(12)-B(1)-O(16)#3   | 122.2(10)  |
| B(1)-O(16)#3 | 1.386(13) | O(12)-B(1)-O(5)#4    | 122.5(9)   |
| B(1)-O(5)#4  | 1.404(13) | O(16)#3-B(1)-O(5)#4  | 115.3(9)   |
| B(2)-O(7)    | 1.469(12) | O(7)-B(2)-O(16)#2    | 107.7(8)   |
| B(2)-O(16)#2 | 1.473(12) | O(7)-B(2)-O(2)       | 107.0(8)   |
| B(2)-O(2)    | 1.481(12) | O(16)#2-B(2)-O(2)    | 111.8(8)   |
| B(2)-O(14)#5 | 1.483(12) | O(7)-B(2)-O(14)#5    | 110.8(8)   |
| B(3)-O(19)   | 1.458(12) | O(16)#2-B(2)-O(14)#5 | 108.7(8)   |
| B(3)-O(18)#6 | 1.462(12) | O(2)-B(2)-O(14)#5    | 110.7(8)   |
| B(3)-O(3)    | 1.478(13) | O(19)-B(3)-O(18)#6   | 109.4(8)   |
| B(3)-O(13)   | 1.511(12) | O(19)-B(3)-O(3)      | 110.9(8)   |
| B(4)-O(15)   | 1.448(12) | O(18)#6-B(3)-O(3)    | 112.1(8)   |
| B(4)-O(1)#7  | 1.456(12) | O(19)-B(3)-O(13)     | 111.4(8)   |
| B(4)-O(20)   | 1.481(13) | O(18)#6-B(3)-O(13)   | 109.1(7)   |
| B(4)-O(5)#4  | 1.491(12) | O(3)-B(3)-O(13)      | 104.0(7)   |
| B(5)-O(18)#4 | 1.460(12) | O(15)-B(4)-O(1)#7    | 113.6(8)   |
| B(5)-O(9)#8  | 1.473(12) | O(15)-B(4)-O(20)     | 108.6(8)   |
| B(5)-O(10)   | 1.477(13) | O(1)#7-B(4)-O(20)    | 111.0(8)   |
| B(5)-O(1)#7  | 1.511(12) | O(15)-B(4)-O(5)#4    | 107.7(8)   |

---

|                    |           |                     |           |
|--------------------|-----------|---------------------|-----------|
| B(6)-O(11)         | 1.457(11) | O(1)#7-B(4)-O(5)#4  | 108.0(8)  |
| B(6)-O(9)          | 1.459(12) | O(20)-B(4)-O(5)#4   | 107.8(8)  |
| B(6)-O(7)#2        | 1.470(12) | O(18)#4-B(5)-O(9)#8 | 108.3(8)  |
| B(6)-O(4)          | 1.489(13) | O(18)#4-B(5)-O(10)  | 113.0(8)  |
| B(7)-O(22)         | 1.305(15) | O(9)#8-B(5)-O(10)   | 110.0(8)  |
| B(7)-O(20)         | 1.375(13) | O(18)#4-B(5)-O(1)#7 | 105.0(7)  |
| B(7)-O(10)         | 1.382(12) | O(9)#8-B(5)-O(1)#7  | 111.9(7)  |
| B(8)-O(17)         | 1.327(13) | O(10)-B(5)-O(1)#7   | 108.6(8)  |
| B(8)-O(8)#7        | 1.374(13) | O(11)-B(6)-O(9)     | 113.3(8)  |
| B(8)-O(15)         | 1.391(13) | O(11)-B(6)-O(7)#2   | 108.7(8)  |
| B(9)-O(19)#9       | 1.430(12) | O(9)-B(6)-O(7)#2    | 107.8(8)  |
| B(9)-O(6)          | 1.445(12) | O(11)-B(6)-O(4)     | 106.1(7)  |
| B(9)-O(8)          | 1.502(12) | O(9)-B(6)-O(4)      | 110.5(8)  |
| B(9)-O(2)          | 1.506(12) | O(7)#2-B(6)-O(4)    | 110.4(8)  |
| B(10)-O(14)        | 1.337(13) | O(22)-B(7)-O(20)    | 118.9(9)  |
| B(10)-O(21)        | 1.345(14) | O(22)-B(7)-O(10)    | 120.8(9)  |
| B(10)-O(6)#4       | 1.389(13) | O(20)-B(7)-O(10)    | 120.3(9)  |
| O(3)-Pb(1)-O(17)   | 80.6(2)   | O(17)-B(8)-O(8)#7   | 124.9(9)  |
| O(3)-Pb(1)-O(3)#1  | 75.6(2)   | O(17)-B(8)-O(15)    | 119.0(9)  |
| O(17)-Pb(1)-O(3)#1 | 119.0(2)  | O(8)#7-B(8)-O(15)   | 116.1(9)  |
| O(4)-Pb(2)-O(12)   | 75.8(2)   | O(19)#9-B(9)-O(6)   | 111.9(8)  |
| O(4)-Pb(2)-O(17)   | 81.8(2)   | O(19)#9-B(9)-O(8)   | 107.3(7)  |
| O(12)-Pb(2)-O(17)  | 119.6(2)  | O(6)-B(9)-O(8)      | 110.3(7)  |
| O(4)-Pb(2)-O(15)   | 92.7(2)   | O(19)#9-B(9)-O(2)   | 112.6(7)  |
| O(12)-Pb(2)-O(15)  | 73.3(2)   | O(6)-B(9)-O(2)      | 110.0(8)  |
| O(17)-Pb(2)-O(15)  | 52.4(2)   | O(8)-B(9)-O(2)      | 104.5(7)  |
| O(3)-Pb(3)-O(13)   | 58.4(2)   | O(14)-B(10)-O(21)   | 123.7(10) |
| O(3)-Pb(3)-O(9)    | 85.3(2)   | O(14)-B(10)-O(6)#4  | 121.2(9)  |
| O(13)-Pb(3)-O(9)   | 66.45(19) | O(21)-B(10)-O(6)#4  | 115.0(9)  |
| O(3)-Pb(3)-O(9)#2  | 122.7(2)  |                     |           |

---

Note. Symmetry transformations used to generate equivalent atoms:

#1  $-x+2, -y, -z+1$     #2  $x+1/2, -y+1/2, -z+1$     #3  $-x+3/2, -y+1/2, z+1/2$     #4  $-x+2, -y+1, -z+1$   
#5  $x-1/2, -y+1/2, -z+1$     #6  $-x+3/2, -y+1/2, z-1/2$     #7  $x, -y+1, z+1/2$     #8  $-x+3/2, y+1/2, z$   
#9  $-x+3/2, y-1/2, z$     #10  $-x+2, y, -z+3/2$     #11  $x, -y+1, z-1/2$

**Figure S1.** The infrared spectrum of  $\text{Pb}_4\text{Zn}_2\text{B}_{10}\text{O}_{21}$ .

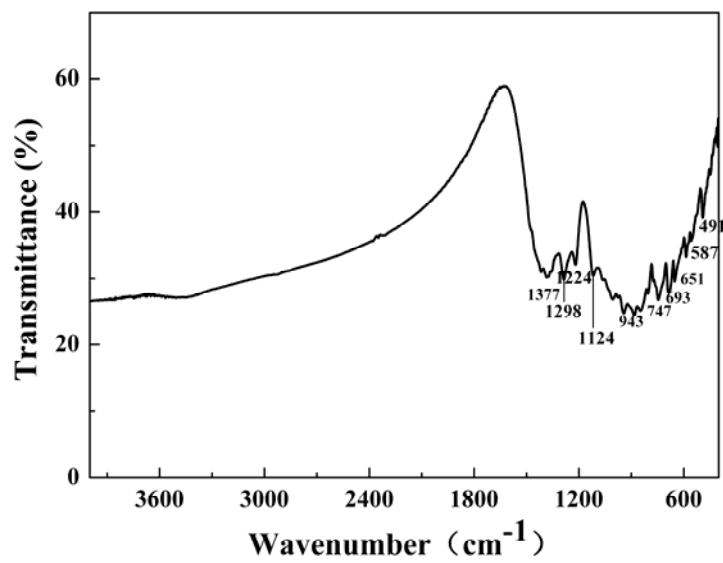

Supplement: c3nj00893b.pdf [file c3nj00893b.pdf]
